# Supplementary material
Source: publisher figshare collection journal article supplement (https://acs.figshare.com/ndownloader/files/4602295)
Supplement: Supplementary file 1 [file 4602295]

# Supporting Information

## Removal of ammonia by OH radical in aqueous phase

*Li Huang, Liang Li†, Wenbo Dong, Yan Liu\*, Huiqi Hou*

Department of Environmental Science and Engineering, Fudan University, Shanghai 200433, China

**RECEIVED DATE (to be automatically inserted after your manuscript is accepted if required according to the journal that you are submitting your paper to)**

\* Corresponding author phone: 86-21-6564-3348; fax: 86-21-6564-3597; e-mail: [liuyan@fudan.edu.cn](mailto:liuyan@fudan.edu.cn).

†Current address: Civil & Environmental Engineering, University of Utah, 122 South Central Campus Drive, Salt Lake City, UTAH 84112, USA

Figure S1 Experiment apparatus of photooxidation of ammonia in the presence of  $\text{H}_2\text{O}_2$

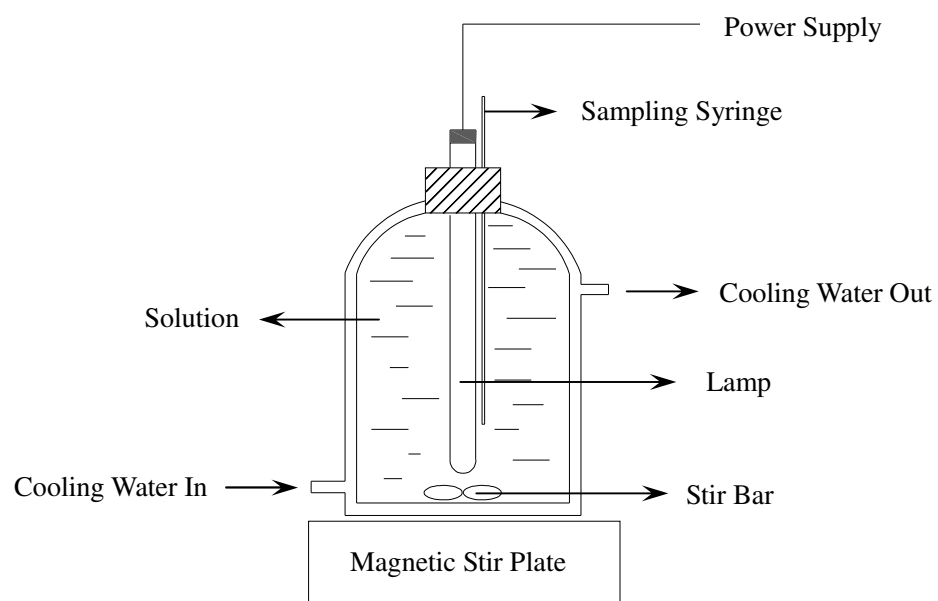

Figure S2 Time profile of ammonia concentration without UV irradiation

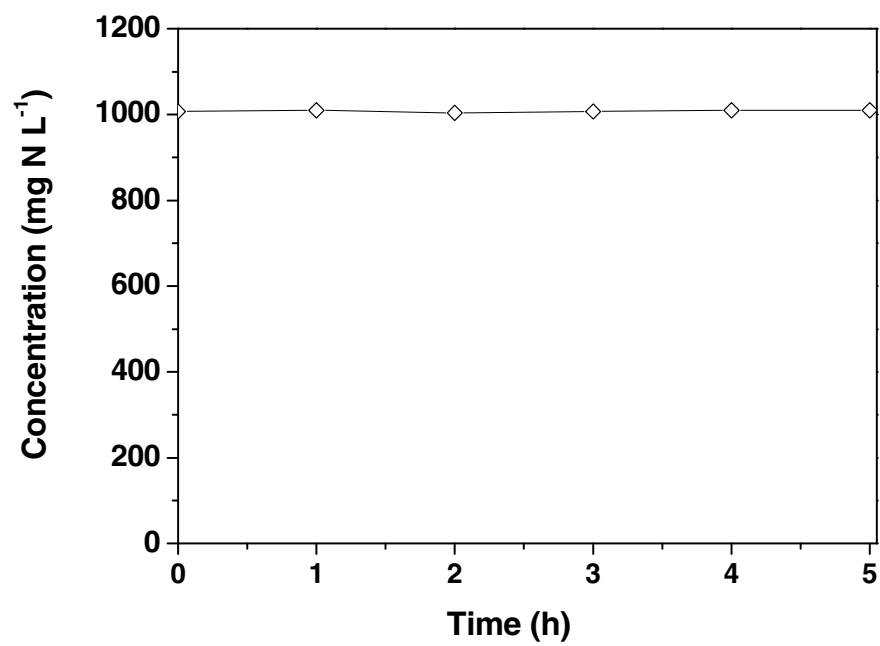

Table S1 Analysis methods for ammonia,  $\text{NO}_2^-$ , and  $\text{NO}_3^-$ .

|                 | Analysis Method                                                                                                                                                                                                                                                                                                                                                                                                      | Detection limit (mg/L) |
|-----------------|----------------------------------------------------------------------------------------------------------------------------------------------------------------------------------------------------------------------------------------------------------------------------------------------------------------------------------------------------------------------------------------------------------------------|------------------------|
| ammonia         | Ammonia-Nessler's reagent colorimetric method: Ammonia is analyzed by its reaction with Nessler's reagent ( $\text{KI} + \text{HgI}_2$ ) in basic condition and is measured spectrophotometrically at 410 nm.                                                                                                                                                                                                        | 0.02                   |
| $\text{NO}_3^-$ | Cadmium reduction method: $\text{NO}_3^-$ is reduced quantitatively to nitrite in the presence of cadmium (Cd). The nitrite produced is determined by diazotizing with sulfanilamide and coupling with N-(1-naphthyl)-ethylenediamine to form a reddish purple azo dye that is measured colorimetrically. A correction should be made for any nitrite present in the sample by analyzing without the reduction step. | 0.01                   |
| $\text{NO}_2^-$ | Colorimetric method: $\text{NO}_2^-$ is determined by diazotizing with sulfanilamide and coupling with N-(1-naphthyl)-ethylenediamine to form a reddish purple azo dye at pH 2.0 to 2.5 which is measured spectrophotometrically at 543 nm.                                                                                                                                                                          | 0.002                  |

Table S2 Ammonia oxidation process at initial H<sub>2</sub>O<sub>2</sub> concentration of 0.02 M

| Time (h) | ammonia concentration (mg-N/L) |       |       |          |       |       |          |       |       |
|----------|--------------------------------|-------|-------|----------|-------|-------|----------|-------|-------|
|          | pH = 2.0                       |       |       | pH = 7.0 |       |       | pH = 9.3 |       |       |
|          | Run 1                          | Run 2 | Run 3 | Run 4    | Run 5 | Run 6 | Run 7    | Run 8 | Run 9 |
| 0        | 1012                           | 102   | 31    | 1003     | 103   | 31    | 1006     | 99    | 31    |
| 1        | 1012                           | 102   | 31    | 997      | 102   | 30    | 991      | 95    | 29    |
| 2        | 1012                           | 102   | 31    | 994      | 102   | 30    | 971      | 88    | 27    |
| 3        | 1012                           | 102   | 31    | 991      | 102   | 30    | 960      | 84    | 25    |
| 4        | 1009                           | 102   | 31    | 991      | 101   | 30    | 948      | 80    | 23    |
| 5        | 1009                           | 102   | 31    | 991      | 101   | 30    | 928      | 79    | 22    |
